# Supplementary material for: Potential Impacts of Climatic Change on European Breeding Birds
Source: PubMed Central journal article supplement (PMC2186378; doi:10.1371/journal.pone.0001439), 2008-01-16
Supplement: pone.0001439.s001.pdf [file pone.0001439.s001.pdf]

**Table S1 : Species included in the synthesis**

| <b>Scientific name</b>             | <b>Common name (English)</b> |
|------------------------------------|------------------------------|
| <i>Gavia stellata</i>              | Red-throated Diver           |
| <i>Gavia arctica</i>               | Black-throated Diver         |
| <i>Gavia immer</i>                 | Great Northern Diver         |
| <i>Tachybaptus ruficollis</i>      | Little Grebe                 |
| <i>Podiceps cristatus</i>          | Great Crested Grebe          |
| <i>Podiceps grisegena</i>          | Red-necked Grebe             |
| <i>Podiceps auritus</i>            | Slavonian Grebe              |
| <i>Podiceps nigricollis</i>        | Black-necked Grebe           |
| <i>Fulmarus glacialis</i>          | Fulmar                       |
| <i>Calonectris diomedea</i>        | Cory's Shearwater            |
| <i>Puffinus puffinus</i>           | Manx Shearwater              |
| <i>Puffinus yelkouan</i>           | Yelkouan Shearwater          |
| <i>Hydrobates pelagicus</i>        | Storm Petrel                 |
| <i>Oceanodroma leucorhoa</i>       | Leach's Storm-petrel         |
| <i>Morus bassanus</i>              | Gannet                       |
| <i>Phalacrocorax carbo</i>         | Cormorant                    |
| <i>Phalacrocorax aristotelis</i>   | Shag                         |
| <i>Phalacrocorax pygmeus</i>       | Pygmy Cormorant              |
| <i>Botaurus stellaris</i>          | Bittern                      |
| <i>Ixobrychus minutus</i>          | Little Bittern               |
| <i>Nycticorax nycticorax</i>       | Night Heron                  |
| <i>Ardeola ralloides</i>           | Squacco Heron                |
| <i>Bubulcus ibis</i>               | Cattle Egret                 |
| <i>Egretta garzetta</i>            | Little Egret                 |
| <i>Egretta alba</i>                | Great White Egret            |
| <i>Ardea cinerea</i>               | Grey heron                   |
| <i>Ardea purpurea</i>              | Purple Heron                 |
| <i>Ciconia nigra</i>               | Black Stork                  |
| <i>Ciconia ciconia</i>             | White Stork                  |
| <i>Plegadis falcinellus</i>        | Glossy Ibis                  |
| <i>Platalea leucorodia</i>         | Spoonbill                    |
| <i>Phoenicopterus ruber</i>        | Greater Flamingo             |
| <i>Cygnus olor</i>                 | Mute Swan                    |
| <i>Cygnus columbianus</i>          | Bewick's Swan                |
| <i>Cygnus cygnus</i>               | Whooper Swan                 |
| <i>Anser fabalis</i>               | Bean Goose                   |
| <i>Anser brachyrhynchus</i>        | Pink-footed Goose            |
| <i>Anser erythropus</i>            | Lesser White-fronted Goose   |
| <i>Anser anser</i>                 | Greylag Goose                |
| <i>Branta leucopsis</i>            | Barnacle Goose               |
| <i>Branta bernicla</i>             | Brent Goose                  |
| <i>Tadorna ferruginea</i>          | Ruddy Shelduck               |
| <i>Tadorna tadorna</i>             | Shelduck                     |
| <i>Anas penelope</i>               | Wigeon                       |
| <i>Anas strepera</i>               | Gadwall                      |
| <i>Anas crecca</i>                 | Teal                         |
| <i>Anas platyrhynchos</i>          | Mallard                      |
| <i>Anas acuta</i>                  | Pintail                      |
| <i>Anas querquedula</i>            | Garganey                     |
| <i>Anas clypeata</i>               | Shoveler                     |
| <i>Marmaronetta angustirostris</i> | Marbled Teal                 |
| <i>Netta rufina</i>                | Red-crested Pochard          |
| <i>Aythya ferina</i>               | Pochard                      |
| <i>Aythya nyroca</i>               | Ferruginous Duck             |
| <i>Aythya fuligula</i>             | Tufted Duck                  |

**Table S1** (continued)

| <b>Scientific name</b>                 | <b>Common name (English)</b> |
|----------------------------------------|------------------------------|
| <i>Aythya marila</i> .....             | Scaup                        |
| <i>Somateria mollissima</i> .....      | Eider                        |
| <i>Somateria spectabilis</i> .....     | King Eider                   |
| <i>Histrionicus histrionicus</i> ..... | Harlequin Duck               |
| <i>Clangula hyemalis</i> .....         | Long-tailed Duck             |
| <i>Melanitta nigra</i> .....           | Common Scoter                |
| <i>Melanitta fusca</i> .....           | Velvet Scoter                |
| <i>Bucephala clangula</i> .....        | Goldeneye                    |
| <i>Mergus albellus</i> .....           | Smew                         |
| <i>Mergus serrator</i> .....           | Red-breasted Merganser       |
| <i>Mergus merganser</i> .....          | Goosander                    |
| <i>Oxyura leucocephala</i> .....       | White-headed Duck            |
| <i>Pernis apivorus</i> .....           | Honey Buzzard                |
| <i>Elanus caeruleus</i> .....          | Black-winged Kite            |
| <i>Milvus migrans</i> .....            | Black Kite                   |
| <i>Milvus milvus</i> .....             | Red Kite                     |
| <i>Haliaeetus albicilla</i> .....      | White-tailed Eagle           |
| <i>Gypaetus barbatus</i> .....         | Lammergeier                  |
| <i>Neophron percnopterus</i> .....     | Egyptian Vulture             |
| <i>Gyps fulvus</i> .....               | Griffon Vulture              |
| <i>Aegyptius monachus</i> .....        | Black Vulture                |
| <i>Circaetus gallicus</i> .....        | Short-toed Eagle             |
| <i>Circus aeruginosus</i> .....        | Marsh Harrier                |
| <i>Circus cyaneus</i> .....            | Hen Harrier                  |
| <i>Circus macrourus</i> .....          | Pallid Harrier               |
| <i>Circus pygargus</i> .....           | Monagu's Harrier             |
| <i>Accipiter gentilis</i> .....        | Goshawk                      |
| <i>Accipiter nisus</i> .....           | Sparrowhawk                  |
| <i>Accipiter brevipes</i> .....        | Levant Sparrowhawk           |
| <i>Buteo buteo</i> .....               | Buzzard                      |
| <i>Buteo rufinus</i> .....             | Long-legged Buzzard          |
| <i>Buteo lagopus</i> .....             | Rough-legged Buzzard         |
| <i>Aquila pomarina</i> .....           | Lesser Spotted Eagle         |
| <i>Aquila clanga</i> .....             | Spotted Eagle                |
| <i>Aquila nipalensis</i> .....         | Steppe Eagle                 |
| <i>Aquila heliaca</i> .....            | Imperial Eagle               |
| <i>Aquila adalberti</i> .....          | Spanish Imperial Eagle       |
| <i>Aquila chrysaetos</i> .....         | Golden Eagle                 |
| <i>Hieraaetus pennatus</i> .....       | Booted Eagle                 |
| <i>Hieraaetus fasciatus</i> .....      | Bonelli's Eagle              |
| <i>Pandion haliaetus</i> .....         | Osprey                       |
| <i>Falco naumanni</i> .....            | Lesser Kestrel               |
| <i>Falco tinnunculus</i> .....         | Kestrel                      |
| <i>Falco vespertinus</i> .....         | Red-footed Falcon            |
| <i>Falco columbarius</i> .....         | Merlin                       |
| <i>Falco subbuteo</i> .....            | Hobby                        |
| <i>Falco eleonora</i> .....            | Eleonora's Falcon            |
| <i>Falco biarmicus</i> .....           | Lanner                       |
| <i>Falco cherrug</i> .....             | Saker Falcon                 |
| <i>Falco rusticolus</i> .....          | Gyrfalcon                    |
| <i>Falco peregrinus</i> .....          | Peregrine Falcon             |
| <i>Bonasa bonasia</i> .....            | Hazel Grouse                 |
| <i>Lagopus lagopus</i> .....           | Willow Grouse                |
| <i>Lagopus mutus</i> .....             | Ptarmigan                    |
| <i>Tetrao tetrix</i> .....             | Black Grouse                 |
| <i>Tetrao urogallus</i> .....          | Capercaillie                 |
| <i>Alectoris chukar</i> .....          | Chukar                       |

**Table S1** (continued)

| <b>Scientific name</b>         | <b>Common name (English)</b> |
|--------------------------------|------------------------------|
| <i>Alectoris graeca</i>        | Rock Partridge               |
| <i>Alectoris rufa</i>          | Red-legged Partridge         |
| <i>Alectoris barbara</i>       | Barbary Partridge            |
| <i>Perdix perdix</i>           | Grey Partridge               |
| <i>Coturnix coturnix</i>       | Quail                        |
| <i>Phasianus colchicus</i>     | Pheasant                     |
| <i>Rallus aquaticus</i>        | Water Rail                   |
| <i>Porzana porzana</i>         | Spotted Crake                |
| <i>Porzana parva</i>           | Little Crake                 |
| <i>Porzana pusilla</i>         | Baillon's Crake              |
| <i>Crex crex</i>               | Corncrake                    |
| <i>Gallinula chloropus</i>     | Moorhen                      |
| <i>Porphyrio porphyrio</i>     | Purple Gallinule             |
| <i>Fulica atra</i>             | Coot                         |
| <i>Fulica cristata</i>         | Crested Coot                 |
| <i>Grus grus</i>               | Crane                        |
| <i>Anthropoides virgo</i>      | Demoiselle Crane             |
| <i>Tetrax tetrax</i>           | Little Bustard               |
| <i>Otis tarda</i>              | Great Bustard                |
| <i>Haematopus ostralegus</i>   | Oystercatcher                |
| <i>Himantopus himantopus</i>   | Black-winged Stilt           |
| <i>Recurvirostra avosetta</i>  | Avocet                       |
| <i>Burhinus oedicnemus</i>     | Stone Curlew                 |
| <i>Glareola pratincola</i>     | Collared Pratincole          |
| <i>Glareola nordmanni</i>      | Black-winged Pratincole      |
| <i>Charadrius dubius</i>       | Little Ringed Plover         |
| <i>Charadrius hiaticula</i>    | Ringed Plover                |
| <i>Charadrius alexandrinus</i> | Kentish Plover               |
| <i>Charadrius asiaticus</i>    | Caspian Plover               |
| <i>Charadrius morinellus</i>   | Dotterel                     |
| <i>Pluvialis apricaria</i>     | Golden Plover                |
| <i>Pluvialis squatarola</i>    | Grey Plover                  |
| <i>Vanellus gregarius</i>      | Sociable Plover              |
| <i>Vanellus vanellus</i>       | Lapwing                      |
| <i>Calidris alba</i>           | Sanderling                   |
| <i>Calidris minuta</i>         | Little Stint                 |
| <i>Calidris temminckii</i>     | Temminck's Stint             |
| <i>Calidris maritima</i>       | Purple Sandpiper             |
| <i>Calidris alpina</i>         | Dunlin                       |
| <i>Limicola falcinellus</i>    | Broad-billed Sandpiper       |
| <i>Philomachus pugnax</i>      | Ruff                         |
| <i>Lymnocyptes minimus</i>     | Jack Snipe                   |
| <i>Gallinago gallinago</i>     | Snipe                        |
| <i>Gallinago media</i>         | Great Snipe                  |
| <i>Gallinago stenura</i>       | Pintail Snipe                |
| <i>Scolopax rusticola</i>      | Woodcock                     |
| <i>Limosa limosa</i>           | Black-tailed Godwit          |
| <i>Limosa lapponica</i>        | Bar-tailed Godwit            |
| <i>Numenius phaeopus</i>       | Whimbrel                     |
| <i>Numenius arquata</i>        | Curlew                       |
| <i>Tringa erythropus</i>       | Spotted Redshank             |
| <i>Tringa totanus</i>          | Redshank                     |
| <i>Tringa stagnatilis</i>      | Marsh Sandpiper              |
| <i>Tringa nebularia</i>        | Greenshank                   |
| <i>Tringa ochropus</i>         | Green Sandpiper              |
| <i>Tringa glareola</i>         | Wood Sandpiper               |
| <i>Xenus cinereus</i>          | Terek Sandpiper              |

**Table S1** (continued)

| <b>Scientific name</b>          | <b>Common name (English)</b> |
|---------------------------------|------------------------------|
| <i>Actitis hypoleucos</i>       | Common Sandpiper             |
| <i>Arenaria interpres</i>       | Turnstone                    |
| <i>Phalaropus lobatus</i>       | Red-necked Phalarope         |
| <i>Phalaropus fulicarius</i>    | Grey Phalarope               |
| <i>Stercorarius pomarinus</i>   | Pomarine Skua                |
| <i>Stercorarius parasiticus</i> | Arctic Skua                  |
| <i>Stercorarius longicaudus</i> | Long-tailed Skua             |
| <i>Stercorarius skua</i>        | Great Skua                   |
| <i>Larus ichthyaetus</i>        | Great Black-headed Gull      |
| <i>Larus melanocephalus</i>     | Mediterranean Gull           |
| <i>Larus minutus</i>            | Little Gull                  |
| <i>Larus ridibundus</i>         | Black-headed Gull            |
| <i>Larus audouinii</i>          | Audouin's Gull               |
| <i>Larus canus</i>              | Common Gull                  |
| <i>Larus fuscus</i>             | Lesser Black-backed Gull     |
| <i>Larus argentatus</i>         | Herring Gull                 |
| <i>Larus cachinnans</i>         | Yellow-legged Gull           |
| <i>Larus hyperboreus</i>        | Glaucous Gull                |
| <i>Larus marinus</i>            | Great Black-backed Gull      |
| <i>Rissa tridactyla</i>         | Kittiwake                    |
| <i>Pagophila eburnea</i>        | Ivory Gull                   |
| <i>Gelochelidon nilotica</i>    | Gull-billed Tern             |
| <i>Sterna caspia</i>            | Caspian Tern                 |
| <i>Sterna sandvicensis</i>      | Sandwich Tern                |
| <i>Sterna dougallii</i>         | Roseate Tern                 |
| <i>Sterna hirundo</i>           | Common Tern                  |
| <i>Sterna paradisaea</i>        | Arctic Tern                  |
| <i>Sterna albifrons</i>         | Little Tern                  |
| <i>Chlidonias hybridus</i>      | Whiskered Tern               |
| <i>Chlidonias niger</i>         | Black Tern                   |
| <i>Chlidonias leucopterus</i>   | White-winged Black Tern      |
| <i>Uria aalge</i>               | Guillemot                    |
| <i>Uria lomvia</i>              | Brünnich's Guillemot         |
| <i>Alca torda</i>               | Razorbill                    |
| <i>Cephus grylle</i>            | Black Guillemot              |
| <i>Alle alle</i>                | Little Auk                   |
| <i>Fratercula arctica</i>       | Puffin                       |
| <i>Pterocles orientalis</i>     | Black-bellied Sandgrouse     |
| <i>Pterocles alchata</i>        | Pin-tailed Sandgrouse        |
| <i>Columba livia</i>            | Rock Dove / Feral Pigeon     |
| <i>Columba oenas</i>            | Stock Dove                   |
| <i>Columba palumbus</i>         | Woodpigeon                   |
| <i>Streptopelia decaocto</i>    | Collared Dove                |
| <i>Streptopelia turtur</i>      | Turtle Dove                  |
| <i>Clamator glandarius</i>      | Great Spotted Cuckoo         |
| <i>Cuculus canorus</i>          | Cuckoo                       |
| <i>Cuculus saturatus</i>        | Oriental Cuckoo              |
| <i>Tyto alba</i>                | Barn Owl                     |
| <i>Otus scops</i>               | Scops Owl                    |
| <i>Bubo bubo</i>                | Eagle Owl                    |
| <i>Nyctea scandiaca</i>         | Snowy Owl                    |
| <i>Surnia ulula</i>             | Hawk Owl                     |
| <i>Glaucidium passerinum</i>    | Pygmy Owl                    |
| <i>Athene noctua</i>            | Little Owl                   |
| <i>Strix aluco</i>              | Tawny Owl                    |
| <i>Strix uralensis</i>          | Ural Owl                     |
| <i>Strix nebulosa</i>           | Great Grey Owl               |

**Table S1** (continued)

| <b>Scientific name</b>           | <b>Common name (English)</b> |
|----------------------------------|------------------------------|
| <i>Asio otus</i>                 | Long-eared Owl               |
| <i>Asio flammeus</i>             | Short-eared Owl              |
| <i>Aegolius funereus</i>         | Tengmalm's Owl               |
| <i>Caprimulgus europaeus</i>     | Nightjar                     |
| <i>Caprimulgus ruficollis</i>    | Red-necked Nightjar          |
| <i>Apus apus</i>                 | Swift                        |
| <i>Apus pallidus</i>             | Pallid Swift                 |
| <i>Apus melba</i>                | Alpine Swift                 |
| <i>Apus caffer</i>               | White-rumped Swift           |
| <i>Alcedo atthis</i>             | Kingfisher                   |
| <i>Merops apiaster</i>           | Bee-eater                    |
| <i>Coracias garrulus</i>         | Roller                       |
| <i>Upupa epops</i>               | Hoopoe                       |
| <i>Jynx torquilla</i>            | Wryneck                      |
| <i>Picus canus</i>               | Grey-headed Woodpecker       |
| <i>Picus viridis</i>             | Green Woodpecker             |
| <i>Dryocopus martius</i>         | Black Woodpecker             |
| <i>Dendrocopos major</i>         | Great Spotted Woodpecker     |
| <i>Dendrocopos syriacus</i>      | Syrian Woodpecker            |
| <i>Dendrocopos medius</i>        | Middle Spotted Woodpecker    |
| <i>Dendrocopos leucotos</i>      | White-backed Woodpecker      |
| <i>Dendrocopos minor</i>         | Lesser Spotted Woodpecker    |
| <i>Picoides tridactylus</i>      | Three-toed Woodpecker        |
| <i>Chersophilus duponti</i>      | Dupont's Lark                |
| <i>Melanocorypha calandra</i>    | Calandra Lark                |
| <i>Calandrella brachydactyla</i> | Short-toed Lark              |
| <i>Calandrella rufescens</i>     | Lesser Short-toed Lark       |
| <i>Galerida cristata</i>         | Crested Lark                 |
| <i>Galerida theklae</i>          | Thekla Lark                  |
| <i>Lullula arborea</i>           | Woodlark                     |
| <i>Alauda arvensis</i>           | Skylark                      |
| <i>Eremophila alpestris</i>      | Shore Lark                   |
| <i>Riparia riparia</i>           | Sand Martin                  |
| <i>Ptyonoprogne rupestris</i>    | Crag Martin                  |
| <i>Hirundo rustica</i>           | Swallow                      |
| <i>Hirundo daurica</i>           | Red-rumped Swallow           |
| <i>Delichon urbicum</i>          | House Martin                 |
| <i>Anthus campestris</i>         | Tawny Pipit                  |
| <i>Anthus berthelotii</i>        | Berthelot's Pipit            |
| <i>Anthus hodgsoni</i>           | Olive-backed Pipit           |
| <i>Anthus trivialis</i>          | Tree Pipit                   |
| <i>Anthus pratensis</i>          | Meadow Pipit                 |
| <i>Anthus cervinus</i>           | Red-throated Pipit           |
| <i>Anthus spinoletta</i>         | Water Pipit                  |
| <i>Anthus petrosus</i>           | Rock Pipit                   |
| <i>Motacilla flava</i>           | Yellow Wagtail               |
| <i>Motacilla citreola</i>        | Citrine Wagtail              |
| <i>Motacilla cinerea</i>         | Grey Wagtail                 |
| <i>Motacilla alba</i>            | White Wagtail                |
| <i>Bombycilla garrulus</i>       | Waxwing                      |
| <i>Cinclus cinclus</i>           | Dipper                       |
| <i>Troglodytes troglodytes</i>   | Wren                         |
| <i>Prunella modularis</i>        | Dunnock                      |
| <i>Prunella montanella</i>       | Siberian Accentor            |
| <i>Prunella atrogularis</i>      | Black-throated Accentor      |
| <i>Prunella collaris</i>         | Alpine Accentor              |
| <i>Cercotrichas galactotes</i>   | Rufous Bush Robin            |

**Table S1** (continued)

| <b>Scientific name</b>                           | <b>Common name (English)</b>         |
|--------------------------------------------------|--------------------------------------|
| <i>Erithacus rubecula</i> .....                  | Robin                                |
| <i>Luscinia luscinia</i> .....                   | Thush Nightingale                    |
| <i>Luscinia megarhynchos</i> .....               | Nightingale                          |
| <i>Luscinia calliope</i> .....                   | Siberian Rubythroat                  |
| <i>Luscinia svecica</i> .....                    | Bluethroat                           |
| <i>Tarsiger cyanurus</i> .....                   | Red-flanked Bluetail                 |
| <i>Phoenicurus ochruros</i> .....                | Black Redstart                       |
| <i>Phoenicurus phoenicurus</i> .....             | Redstart                             |
| <i>Saxicola rubetra</i> .....                    | Whinchat                             |
| <i>Saxicola torquata</i> .....                   | Stonechat                            |
| <i>Oenanthe isabellina</i> .....                 | Isabelline Wheatear                  |
| <i>Oenanthe oenanthe</i> .....                   | Wheatear                             |
| <i>Oenanthe pleschanka</i> .....                 | Pied Wheatear                        |
| <i>Oenanthe hispanica</i> .....                  | Black-eared Wheatear                 |
| <i>Oenanthe leucura</i> .....                    | Black Wheatear                       |
| <i>Monticola saxatilis</i> .....                 | Rock Thrush                          |
| <i>Monticola solitarius</i> .....                | Blue Rock Thrush                     |
| <i>Zoothera dauma</i> .....                      | White's Thrush                       |
| <i>Turdus torquatus</i> .....                    | Ring Ouzel                           |
| <i>Turdus merula</i> .....                       | Blackbird                            |
| <i>Turdus ruficollis</i> .....                   | Black-throated Thrush                |
| <i>Turdus pilaris</i> .....                      | Fieldfare                            |
| <i>Turdus philomelos</i> .....                   | Song Thrush                          |
| <i>Turdus iliacus</i> .....                      | Redwing                              |
| <i>Turdus viscivorus</i> .....                   | Mistle Thrush                        |
| <i>Cettia cetti</i> .....                        | Cetti's Warbler                      |
| <i>Cisticola juncidis</i> .....                  | Fan-tailed Warbler                   |
| <i>Locustella lanceolata</i> .....               | Lanceolated Warbler                  |
| <i>Locustella naevia</i> .....                   | Grasshopper Warbler                  |
| <i>Locustella fluviatilis</i> .....              | River Warbler                        |
| <i>Locustella luscinioides</i> .....             | Savi's Warbler                       |
| <i>Acrocephalus melanopogon</i> .....            | Moustached warbler                   |
| <i>Acrocephalus paludicola</i> .....             | Aquatic Warbler                      |
| <i>Acrocephalus schoenobaenus</i> .....          | Sedge warbler                        |
| <i>Acrocephalus agricola</i> .....               | Paddyfeild Warbler                   |
| <i>Acrocephalus dumetorum</i> .....              | Blyth's Reed Warbler                 |
| <i>Acrocephalus palustris</i> .....              | Marsh Warbler                        |
| <i>Acrocephalus scirpaceus</i> .....             | Reed warbler                         |
| <i>Acrocephalus arundinaceus</i> .....           | Great Reed warbler                   |
| <i>Hippolais opaca / H. pallida</i> .....        | Western / Eastern Olivaceous Warbler |
| <i>Hippolais olivetorum</i> .....                | Olive-tree Warbler                   |
| <i>Hippolais icterina</i> .....                  | Icterine Warbler                     |
| <i>Hippolais polyglotta</i> .....                | Melodious Warbler                    |
| <i>Sylvia balearica / S. sarda</i> .....         | Balearic / Marmora's Warbler         |
| <i>Sylvia undata</i> .....                       | Dartford Warbler                     |
| <i>Sylvia conspicillata</i> .....                | Spectacled Warbler                   |
| <i>Sylvia cantillans</i> .....                   | Subalpine Warbler                    |
| <i>Sylvia melanocephala</i> .....                | Sardinian Warbler                    |
| <i>Sylvia rueppelli</i> .....                    | Rüppell's Warbler                    |
| <i>Sylvia hortensis / S. crassirostris</i> ..... | Western / Eastern Orphean Warbler    |
| <i>Sylvia nisoria</i> .....                      | Barred Warbler                       |
| <i>Sylvia curruca</i> .....                      | Lesser Whitethroat                   |
| <i>Sylvia communis</i> .....                     | Whitethroat                          |
| <i>Sylvia borin</i> .....                        | Garden Warbler                       |
| <i>Sylvia atricapilla</i> .....                  | Blackcap                             |
| <i>Phylloscopus trochiloides</i> .....           | Greenish Warbler                     |
| <i>Phylloscopus borealis</i> .....               | Arctic Warbler                       |

**Table S1** (continued)

| <b>Scientific name</b>                                   | <b>Common name (English)</b>             |
|----------------------------------------------------------|------------------------------------------|
| <i>Phylloscopus inornatus</i> .....                      | Yellow-browed Warbler                    |
| <i>Phylloscopus bonelli</i> / <i>P. orientalis</i> ..... | Bonelli's / Eastern Bonelli's Warbler    |
| <i>Phylloscopus sibilatrix</i> .....                     | Wood Warbler                             |
| <i>Phylloscopus collybita</i> / <i>P. ibericus</i> ..... | Chiffchaff / Iberian Chiffchaff          |
| <i>Phylloscopus trochilus</i> .....                      | Willow Warbler                           |
| <i>Regulus regulus</i> .....                             | Goldcrest                                |
| <i>Regulus ignicapillus</i> .....                        | Firecrest                                |
| <i>Muscicapa striata</i> .....                           | Spotted Flycatcher                       |
| <i>Ficedula parva</i> .....                              | Red-breasted Flycatcher                  |
| <i>Ficedula semitorquata</i> .....                       | Semi-collared Flycatcher                 |
| <i>Ficedula albicollis</i> .....                         | Collared Flycatcher                      |
| <i>Ficedula hypoleuca</i> .....                          | Pied Flycatcher                          |
| <i>Panurus biarmicus</i> .....                           | Bearded Tit                              |
| <i>Aegithalos caudatus</i> .....                         | Long-tailed Tit                          |
| <i>Parus palustris</i> .....                             | Marsh Tit                                |
| <i>Parus lugubris</i> .....                              | Sombre Tit                               |
| <i>Parus montanus</i> .....                              | Willow Tit                               |
| <i>Parus cinctus</i> .....                               | Siberian Tit                             |
| <i>Parus cristatus</i> .....                             | Crested Tit                              |
| <i>Parus ater</i> .....                                  | Coal Tit                                 |
| <i>Parus caeruleus</i> .....                             | Blue Tit                                 |
| <i>Parus cyanus</i> .....                                | Azure Tit                                |
| <i>Parus major</i> .....                                 | Great Tit                                |
| <i>Sitta krueperi</i> .....                              | Krüper's Nuthatch                        |
| <i>Sitta europaea</i> .....                              | Nuthatch                                 |
| <i>Sitta neumayer</i> .....                              | Rock Nuthatch                            |
| <i>Tichodroma muraria</i> .....                          | Wallcreeper                              |
| <i>Certhia familiaris</i> .....                          | Treecreeper                              |
| <i>Certhia brachydactyla</i> .....                       | Short-toed Treecreeper                   |
| <i>Remiz pendulinus</i> .....                            | Penduline Tit                            |
| <i>Oriolus oriolus</i> .....                             | Golden Oriole                            |
| <i>Lanius collurio</i> .....                             | Red-backed Shrike                        |
| <i>Lanius minor</i> .....                                | Lesser Grey Shrike                       |
| <i>Lanius excubitor</i> / <i>L. meridionalis</i> .....   | Great Grey Shrike / Southern Grey Shrike |
| <i>Lanius senator</i> .....                              | Woodchat Shrike                          |
| <i>Lanius nubicus</i> .....                              | Masked Shrike                            |
| <i>Garrulus glandarius</i> .....                         | Jay                                      |
| <i>Perisoreus infaustus</i> .....                        | Siberian Jay                             |
| <i>Cyanopica cyanus</i> .....                            | Azure-winged Magpie                      |
| <i>Pica pica</i> .....                                   | Magpie                                   |
| <i>Nucifraga caryocatactes</i> .....                     | Nutcracker                               |
| <i>Pyrrhocorax graculus</i> .....                        | Alpine Chough                            |
| <i>Pyrrhocorax pyrrhocorax</i> .....                     | Chough                                   |
| <i>Corvus monedula</i> .....                             | Jackdaw                                  |
| <i>Corvus frugilegus</i> .....                           | Rook                                     |
| <i>Corvus corone</i> / <i>C. cornix</i> .....            | Carrion Crow / Hooded Crow               |
| <i>Corvus corax</i> .....                                | Raven                                    |
| <i>Sturnus vulgaris</i> .....                            | Starling                                 |
| <i>Sturnus unicolor</i> .....                            | Spotless Starling                        |
| <i>Sturnus roseus</i> .....                              | Rose-coloured Starling                   |
| <i>Passer domesticus</i> .....                           | House Sparrow                            |
| <i>Passer x italiae</i> .....                            | Italian Sparrow                          |
| <i>Passer hispaniolensis</i> .....                       | Spanish Sparrow                          |
| <i>Passer montanus</i> .....                             | Tree Sparrow                             |
| <i>Petronia petronia</i> .....                           | Rock Sparrow                             |
| <i>Montifringilla nivalis</i> .....                      | Snowfinch                                |
| <i>Fringilla coelebs</i> .....                           | Chaffinch                                |

**Table S1** (continued)

| <b>Scientific name</b>                       | <b>Common name (English)</b>    |
|----------------------------------------------|---------------------------------|
| <i>Fringilla montifringilla</i>              | Brambling                       |
| <i>Serinus serinus</i>                       | Serin                           |
| <i>Serinus citrinella</i>                    | Citril Finch                    |
| <i>Carduelis chloris</i>                     | Greenfinch                      |
| <i>Carduelis carduelis</i>                   | Goldfinch                       |
| <i>Carduelis spinus</i>                      | Siskin                          |
| <i>Carduelis cannabina</i>                   | Linnet                          |
| <i>Carduelis flavirostris</i>                | Twite                           |
| <i>Carduelis flammea</i> / <i>C. cabaret</i> | Common Redpoll / Lesser Redpoll |
| <i>Carduelis hornemanni</i>                  | Arctic Redpoll                  |
| <i>Loxia leucoptera</i>                      | Two-barred Crossbill            |
| <i>Loxia curvirostra</i>                     | Crossbill                       |
| <i>Loxia scotica</i>                         | Scottish Crossbill              |
| <i>Loxia pytyopsittacus</i>                  | Parrot Crossbill                |
| <i>Bucanetes githagineus</i>                 | Trumpeter Finch                 |
| <i>Carpodacus erythrinus</i>                 | Scarlet Rosefinch               |
| <i>Pinicola enucleator</i>                   | Pine Grosbeak                   |
| <i>Pyrrhula pyrrhula</i>                     | Bullfinch                       |
| <i>Coccothraustes coccothraustes</i>         | Hawfinch                        |
| <i>Calcarius lapponicus</i>                  | Lapland Bunting                 |
| <i>Plectrophenax nivalis</i>                 | Snow Bunting                    |
| <i>Emberiza citrinella</i>                   | Yellowhammer                    |
| <i>Emberiza cirlus</i>                       | Cirl Bunting                    |
| <i>Emberiza cia</i>                          | Rock Bunting                    |
| <i>Emberiza cineracea</i>                    | Cinereous Bunting               |
| <i>Emberiza hortulana</i>                    | Ortolan Bunting                 |
| <i>Emberiza caesia</i>                       | Cretzschmar's Bunting           |
| <i>Emberiza rustica</i>                      | Rustic Bunting                  |
| <i>Emberiza pusilla</i>                      | Little Bunting                  |
| <i>Emberiza aureola</i>                      | Yellow-breasted Bunting         |
| <i>Emberiza schoeniclus</i>                  | Reed Bunting                    |
| <i>Emberiza pallasi</i>                      | Pallas's Reed Bunting           |
| <i>Emberiza melanocephala</i>                | Black-headed Bunting            |
| <i>Miliaria calandra</i>                     | Corn Bunting                    |
