# Supplementary material for: Potential Impacts of Climatic Change on European Breeding Birds
Source: PubMed Central journal article supplement (PMC2186378; doi:10.1371/journal.pone.0001439), 2008-01-16
Supplement: pone.0001439.s002.pdf [file pone.0001439.s002.pdf]

**Table S2: Population estimates for Europe for 10 endemic and near-endemic species<sup>†</sup> and for examples of their widespread relatives**

| Endemic and near-endemic species<br>with potential overlap < 10 %                                           |                                           | Related comparator species                         |                                           | Ratio of<br>European<br>populations |
|-------------------------------------------------------------------------------------------------------------|-------------------------------------------|----------------------------------------------------|-------------------------------------------|-------------------------------------|
| Endemics                                                                                                    | Total European<br>Population <sup>‡</sup> |                                                    | Total European<br>Population <sup>‡</sup> |                                     |
| <i>Aquila adalberti</i><br>Spanish Imperial<br>Eagle                                                        | 155<br>(150 – 160)                        | <i>Aquila chrysaetos</i><br>Golden Eagle           | 5412<br>(5239 – 5616)                     | 34.916                              |
| <i>Sylvia balearica</i> /<br><i>S. sarda</i><br>Balearic Warbler /<br>Marmora's Warbler                     | 39,921<br>(33,317 – 49,003)               | <i>Sylvia undata</i><br>Dartford Warbler           | 2,624,617<br>(2,025,456 – 3,635,791)      | 65.745                              |
| <i>Cyanopica cyanus</i><br>Azure-winged<br>Magpie                                                           | 281,423<br>(257,683 – 350,557)            | <i>Pica pica</i><br>Magpie                         | 9,028,781<br>(7,696,302 – 11,984,013)     | 32.083                              |
| <i>Serinus citrinella</i><br>Citril Finch                                                                   | 260,091<br>(251,722 – 279,620)            | <i>Serinus serinus</i><br>Serin                    | 11,511,967<br>(10,095,566 – 13,496,108)   | 44.261                              |
| <i>Loxia scotica</i><br>Scottish Crossbill                                                                  | 612<br>(300 – 1250)                       | <i>Loxia curvirostra</i><br>Crossbill              | 1,202,176<br>(1,004,141 – 1,632,437)      | 1964.340                            |
| <b>Near-endemics</b>                                                                                        |                                           |                                                    |                                           |                                     |
| <i>Calonectris<br/>diomedea</i><br>Cory's Shearwater                                                        | 142,722<br>(121,536 – 172,591)            | <i>Fulmarus glacialis</i><br>Fulmar                | 2,759,431<br>(2,261,216 – 3,549,427)      | 19.334                              |
| <i>Puffinus yelkouan</i> /<br><i>P. mauretanicus</i><br>Levantine<br>Shearwater /<br>Balearic<br>Shearwater | 21,241<br>(18,036 – 25,343)               | <i>Puffinus puffinus</i><br>Manx Shearwater        | 302,342<br>(284,260 – 323,490)            | 14.234                              |
| <i>Larus<br/>melanocephalus</i><br>Mediterranean Gull                                                       | 249,862<br>(183,925 – 339,963)            | <i>Larus ridibundus</i><br>Black-headed Gull       | 2,087,768<br>(1,985,158 – 2,246,547)      | 8.356                               |
| <i>Larus audouinii</i><br>Audouin's Gull                                                                    | 13,355<br>(13,304 – 13,410)               | <i>Larus cachinnans</i><br>Yellow-legged Gull      | 208,122<br>(198,341 – 220,323)            | 15.584                              |
| <i>Acrocephalus<br/>paludicola</i><br>Aquatic Warbler                                                       | 4684<br>(2852 – 7856)                     | <i>Acrocephalus<br/>scirpaceus</i><br>Reed Warbler | 3,138,033<br>(2,683,670 – 3,735,367)      | 669.947                             |
| <b>Median</b>                                                                                               |                                           |                                                    |                                           | <b>33.500</b>                       |

<sup>†</sup> The five endemic and five near-endemic species tabulated are those with potential range overlaps of < 10 % of their present range extent for the HadCM3 SRES B2 climatic change scenario.

<sup>‡</sup> Population estimates are from: Hagemeyer EJM, Blair MJ, editors (1997) *The EBCC Atlas of European Breeding Birds: Their distribution and abundance*. London: T. & A.D. Poyser. 903 p.
